# Should the Bee Suck Honey or Lard?

## That is the question

AARON I. VINIK, MD, PHD  
THOMAS J. LAUTERIO, PHD  
RENA R. WING, PHD

**O**f all the nonpharmacologic endeavors available to diabetic patients to mitigate the complications of diabetes, none has as profound an effect as nutritional manipulation. There has, however, continued to be a great CHO versus fat controversy. The *Papyrus Ebers*, written around 1500 BC, advocated a high-CHO diet consisting of wheat grains, fruit, and sweet beer "to drive away the passing of too much urine." Araetus the Cappadocian coined the term diabetes (to flow through), and prescribed starches, fruit, and sweet wines (1). These sentiments were echoed by the ADA in their consensus statement *Nutritional Recommendations and Principles for Individuals with Diabetes Mellitus* (2), first published in 1986. This statement recommended liberalizing CHO intake, not so much to replace the lost CHO, but to fill the void derived from a restriction in protein intake, to protect the kidney, and to reduce total fat intake to reduce morbidity and mortality from macrovascular disease. The recommendations of ADA were extremely similar to

those being promoted by the AHA and the American Cancer Association, which are concerned with the possible relationship between fat intake, heart disease, and bowel and breast cancer. Other researchers, however, disagree with the liberalization of CHO intake. They argue that a high-CHO intake might worsen glycemic control, and suggest that a high-fat diet is much more palatable to the American public than a high-CHO diet. There is no doubt that meals for "fat teeth" will always suit the hedonistic tendencies of our population. Nonetheless, considerable recent evidence strongly supports the 30% dietary-fat guideline recommended by ADA.

Evidence for the role of dietary fat in diabetic complications derives from numerous studies, both clinical and basic (3–5). These data clearly point to increased disease risk with increased dietary fat. Well-controlled human and animal studies have provided some insight into how dietary fat may alter the physiological response to insulin. Humans with normal body weight fed a diet con-

sisting of 65% fat had measurably decreased insulin sensitivity within 3 days of treatment (6). This study strongly indicates dietary fat, rather than obesity per se, in the resistance to insulin that may herald the onset of diabetic complications.

Further evidence for this relationship has been provided in primate studies (7). Harris and Kor (8) recently provided even more substantial and relevant data as to the importance of dietary fat in insulin sensitivity. In this study, rats fed a 40% fat diet for 10 wk showed significant changes in insulin sensitivity within 3 days of being switched to a 30% fat diet. Total lipid synthesis was also greater in adipocytes from rats fed 40% fat compared with those fed the lower-fat diet. The improvement in insulin sensitivity of animals with the lower fat intake is remarkable because of the short duration of exposure to the 30% fat diet, as well as the fact that dietary fat was only reduced from 40 to 30%. Previous animal experiments in which fat was reduced by 50% (from 30 to 15% of energy) also demonstrated enhancement of the adipocyte response to insulin (9), but the Harris and Kor experiment is more representative of the situation of the typical American, whose diet consists of  $\geq 38\%$  fat. Our animal model of diet-induced obesity in Sprague-Dawley rats (10) provides further evidence for the role of dietary fat in diabetes. In this model,  $\sim 50\%$  of the rats fed a 32.5% fat diet became obese and insulin resistant, while the others remained lean. The implication here is that even low levels of dietary fat by human standards can elicit obesity and insulin resistance in animals so genetically predisposed.

Although the mechanism of insulin resistance remains controversial, the association of insulin resistance with an increased predisposition to macrovascular events cannot be denied (11). Several studies have shown improvements in lipids and glycemic control when subjects have switched from an average American

FROM THE DIABETES INSTITUTE, DEPARTMENT OF INTERNAL MEDICINE, ANATOMY AND NEUROBIOLOGY, AND THE DEPARTMENT OF PHYSIOLOGY, EASTERN VIRGINIA MEDICAL SCHOOL, NORFOLK, VIRGINIA; AND THE UNIVERSITY OF PITTSBURGH SCHOOL OF MEDICINE, PITTSBURGH, PENNSYLVANIA.

ADDRESS CORRESPONDENCE AND REPRINT REQUESTS TO AARON I. VINIK, MD, PHD, DIABETES INSTITUTES, 855 W. BRAMBLETON AVENUE, NORFOLK, VA 23510.

CHO, CARBOHYDRATE; ADA, AMERICAN DIABETES ASSOCIATION; AHA, AMERICAN HEART ASSOCIATION; LDL, LOW-DENSITY LIPOPROTEIN; VLDL, VERY LOW-DENSITY LIPOPROTEIN; IDDM, INSULIN-DEPENDENT DIABETES MELLITUS; NIDDM, NON-INSULIN-DEPENDENT DIABETES MELLITUS.

diet to a low-fat, high-fiber diet, or to a high-monounsaturated fat diet. For example, Ginsberg et al. (12) completed studies in 36 healthy young men being fed an average American diet comprising 38% fat. These young men were then placed on an AHA step-one diet, with 30% of calories from fat, (10% saturated, 10% monounsaturated, and 10% polyunsaturated), or a monounsaturated-supplemented AHA diet with 38% total fat calories (10% saturated, 10% polyunsaturated, and 18% monounsaturated). The results of these studies showed a significant reduction in total cholesterol on both diets, as well as a slight reduction in the total triglycerides and LDL cholesterol. An improvement in the lipid profile was associated with either a reduction in total fat or an 8% increase in monounsaturated fat intake. Garg et al. (13) compared the average American diet with a high-CHO diet (60% CHO, 15% protein, and 25% fat) and a high-monounsaturated fat diet (50% total fat, 35% CHO, and 15% protein). In the monounsaturated fat diet, 33% of fat calories were derived from olive oil, whereas, in the high-CHO diet, the fat was derived from 30% corn oil and 70% palm oil. When subjects were switched from their baseline average American diet to the high-CHO diet, fasting glucose levels fell from  $129 \pm 4$  to  $117 \pm 5$  mg/dl, HbA<sub>1c</sub> from  $11.3 \pm 0.6$  to  $7.8 \pm 0.7\%$ , and triglycerides from  $285 \pm 62$  to  $218 \pm 32$  mg/dl with a fall in VLDL cholesterol from  $58 \pm 12$  to  $43 \pm 7$  mg/dl. These changes from the low-fat, high-CHO diet were similar to those found on the high-monounsaturated fat diet, and were achieved without providing foods of high caloric density for protracted periods, which may have other untoward consequences such as obesity, insulin resistance, dyslipidemia, and predisposition to macrovascular disease. Ireland et al. (14) fed 16 versus 53% fat to 10 IDDM patients, and showed deterioration of CHO tolerance with the high-fat diet. Fat restriction increased sensitivity to insulin, decreased

insulin requirements, and improved glycemic control (14).

Diets rich in fat calories may even promote adiposity, irrespective of energy intake (15), and the benefit of calorie restriction is mitigated if a low-calorie diet is fat-rich (16). In both men (17) and women (18), obesity correlates directly with the fat content of the diet. If the primary objective is to reduce weight in NIDDM patients, the majority of whom are obese, liberalization of fat calories, irrespective of the total number of calories, seems to fly in the face of available information.

The current recommendation for diets consisting of no more than 30% fat seems quite conservative and is supported by the above data. Moreover, the type of dietary fat used in the diet may be less important than the level of fat in the diet (9). Obese NIDDM patients may benefit from even lower levels of dietary fat regardless of the composition of the diet. Diabetic individuals may find it easier and more straightforward to deal with the calculation of an amount of fat rather than trying to analyze the composition of the fat they consume. Overall, there appears to be no doubt that the health risk to these patients may be reduced by observing the 30% dietary fat goal. In this respect, we think that the general recommendations of the National Research Council (4) and the Surgeon General (5) (which were not made arbitrarily nor without considering all the evidence) that "the American public reduce their fat intake" should apply equally well to the subset of people with diabetes until incontrovertible evidence proves otherwise.

**Acknowledgments**—This work was supported in part by National Cancer Institute Grant 1R01CA5464101, National Institutes of Health Grant DK-40982, Merit Award from the Department of Veterans Affairs, and National Institute of Diabetes and Digestive and Kidney Diseases Grant 29757.

## References

1. Vinik AI, Wing RR: The good, the bad, and the ugly in diabetic diets. *Endocrinol Metab Clin North Am* 21:237-79, 1992
2. American Diabetes Association: Therapy for diabetes mellitus and related disorders. *Diabetes Care* 14 (Suppl. 2):20, 1991
3. Danforth E Jr: Diet and obesity. *Am J Clin Nutr* 41:1132-45, 1985
4. Committee on Diet and Health, Food and Nutrition Board, Commission on Life Sciences, National Research Council: *Diet and Health: Implications for Reducing Chronic Disease Risk*. Washington, DC, National Academy Press, 1989
5. U.S. Dept. of Health and Human Services, Public Health Service: *The Surgeon General's Report on Nutrition and Health*. Washington, DC, U.S. Govt. Printing Office, 1988 (DHHS publ. no. 88-50210)
6. Sidery MB, Gallen IW, MacDonald IA: The initial physiological responses to glucose ingestion in normal subjects are modified by a 3 day high-fat diet. *Br J Nutr* 64:705-13, 1990
7. Hansen BC, Jen K-LC, Schwartz J: Changes in insulin responses and binding in adipocytes from monkeys with obesity progressing to diabetes. *Int J Obesity* 12:433-43, 1987
8. Harris RBS, Kor H: Insulin insensitivity is rapidly reversed in rats by reducing dietary fat from 40 to 30% of energy. *J Nutr* 122:1811-22, 1992
9. Van Amelsvoort JMM, van der Beek A, Stam JJ, Houtsmuller UMT: Dietary influence on the insulin function of epididymal fat cell of the Wistar rat. I. Effect of type of fat. *Ann Nutr Metab* 32:138-48, 1988
10. Lauterio TJ, Bond JP, Ulman EA: Development and characterization of defined diet to identify obesity susceptible and resistant populations. *FASEB J* 6:A1118, 1992
11. Garber AJ, Vinik AI, Crespino SR: Detection and management of lipid disorders in diabetic patients: a commentary for clinicians. *Diabetes Care* 15:1068-74, 1992
12. Ginsberg HN, Barr SL, Gilbert BA, Karmally W, Deckelbaum R, Kaplan K, Ramakrishnan R, Holleran S, Dell RB: Reduction of plasma cholesterol levels in normal men on an American Heart As-

- sociation step 1 diet or a step 1 diet with added monounsaturated fat. *N Engl J Med* 322:574-79, 1990
13. Garg A, Bonanome A, Grundy SM, Zhang Z-J, Unger RH: Comparison of a high-carbohydrate diet with a high-monounsaturated fat diet in patients with non-insulin-dependent diabetes mellitus. *N Engl J Med* 319:829-34, 1988
  14. Ireland P, O'Dea K, Nankervis A: Short-term effects of alterations in dietary fat on metabolic control in IDDM. *Diabetes Care* 15:1499-504, 1992
  15. Boozer CN: Dietary fat and adiposity in experimental animals. *Int J Obesity* 15:6, 1991
  16. Boozer CN, Brasseur A, Elhady AH, Atkinson RL: High fat diet promotes retention of body fat and increased LPL during food restriction. *FASEB J* 6:A1211, 1992
  17. Dreon DM, Frey-Hewitt B, Ellsworth N, Williams PT, Terry RB, Wood PD: Dietary fat: carbohydrate ratio and obesity in middle-aged men. *Am J Clin Nutr* 47:995-1000, 1988
  18. Romieu I, Willett WC, Stampfer MJ, Colditz GA, Sampson L, Rosner B, Hennekens CH, Speizer FE: Energy intake and other determinants of relative weight. *Am J Clin Nutr* 47:406-12, 1988
